# Supplementary material
Source: publisher site journal article supplement (https://www.spandidos-publications.com/3215/downloadSupplementary)
Supplement: Supplementary file 1 [file downloadSupplementary]

Figure S1. Green fluorescence in the four transfected cell lines. Scale bar, 100  $\mu$ m. miR, microRNA; KD, knockdown; OE, over-expression.

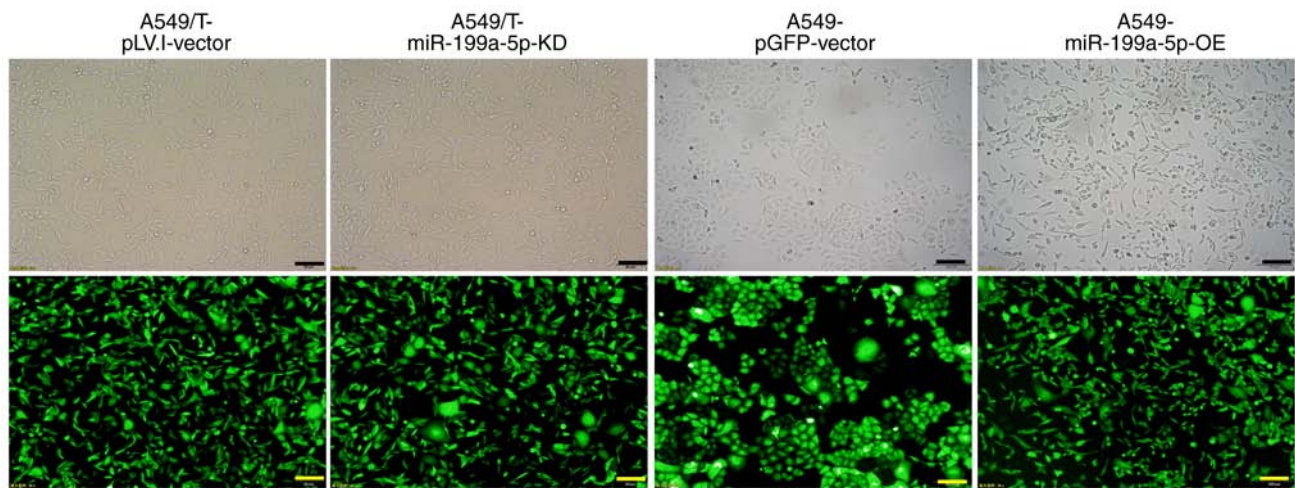

Figure S2. miR-199a-5p binds to ATG5 and decreases its mRNA expression levels. (A) The sequence of the miR-199a-5p binding site within the 3'-UTR of ATG5 was predicted by TargetMiner database. (B) Reverse transcription-quantitative PCR analysis of ATG5 mRNA expression levels in various cell lines. Data are presented as the FC value relative to A549 cells. The experiments were repeated three times. \*\*\*\* $P < 0.0001$ ; ns, not significant; ATG5, autophagy-related 5; FC, fold-change; miR, microRNA; KD, knockdown; OE, overexpression; UTR, untranslated region.

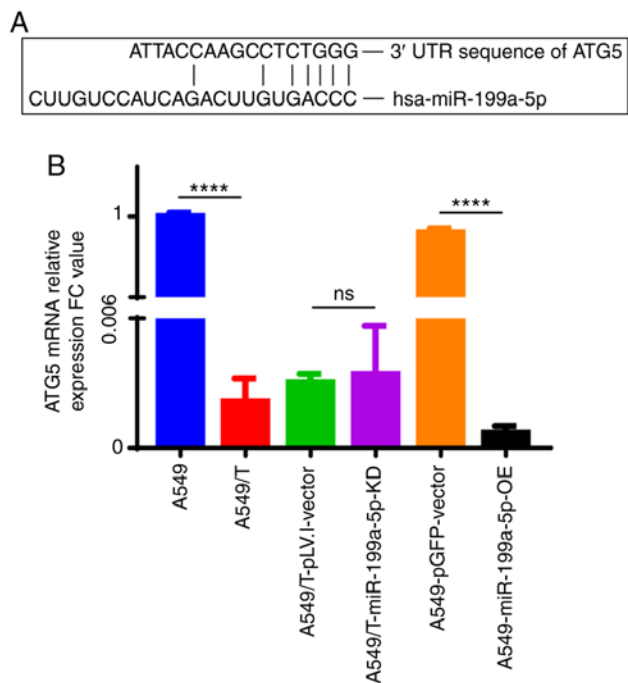

Figure S3. Effects of miR-199a-5p on ABCB1 regulation and cell proliferation. (A) The expression levels of ABCB1 protein in A549/T-miR-199a-5p-KD and A549-miR-199a-5p-OE cells with or without CQ treatment. (B) Proliferation of A549, A549/T, A549/T-miR-199a-5p-KD, A549-miR-199a-5p-OE, A549/T-pLV.I-vector and A549-pGFP-vector cells. \* $P < 0.05$  and \*\* $P < 0.01$ ; ns, not significant; miR, microRNA; KD, knockdown; OE, overexpression; ABCB1, ATP-binding cassette subfamily B member 1; CQ, chloroquine; OD, optical density.

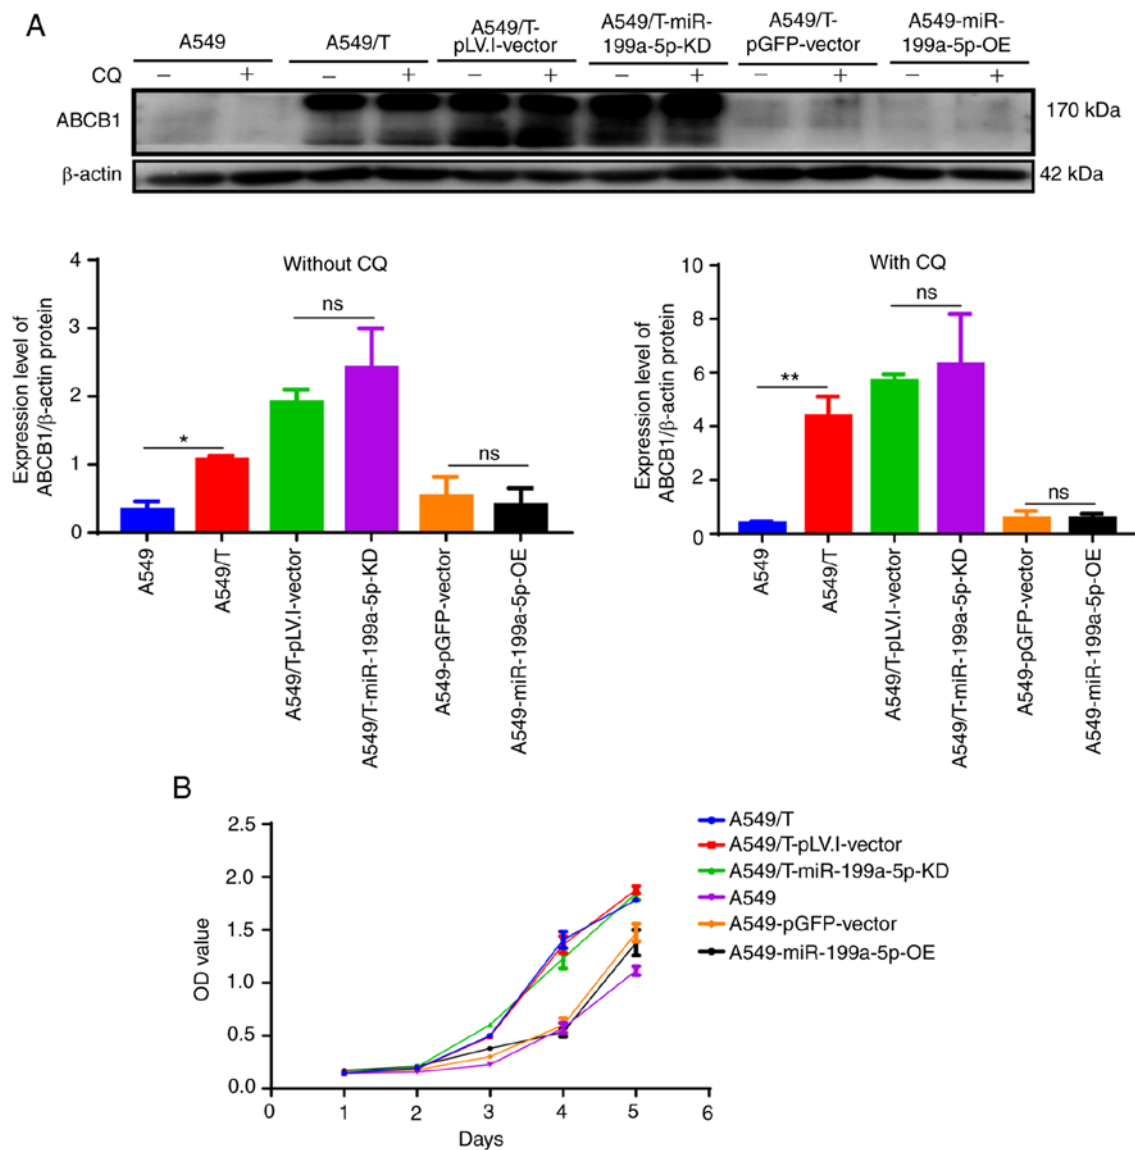

Figure S4. Cell survival curves. Cell survival was determined by the Cell Counting Kit-8 assay following treatment with  $\geq 8$  gradient concentrations of various chemotherapeutic agents for 72 h.

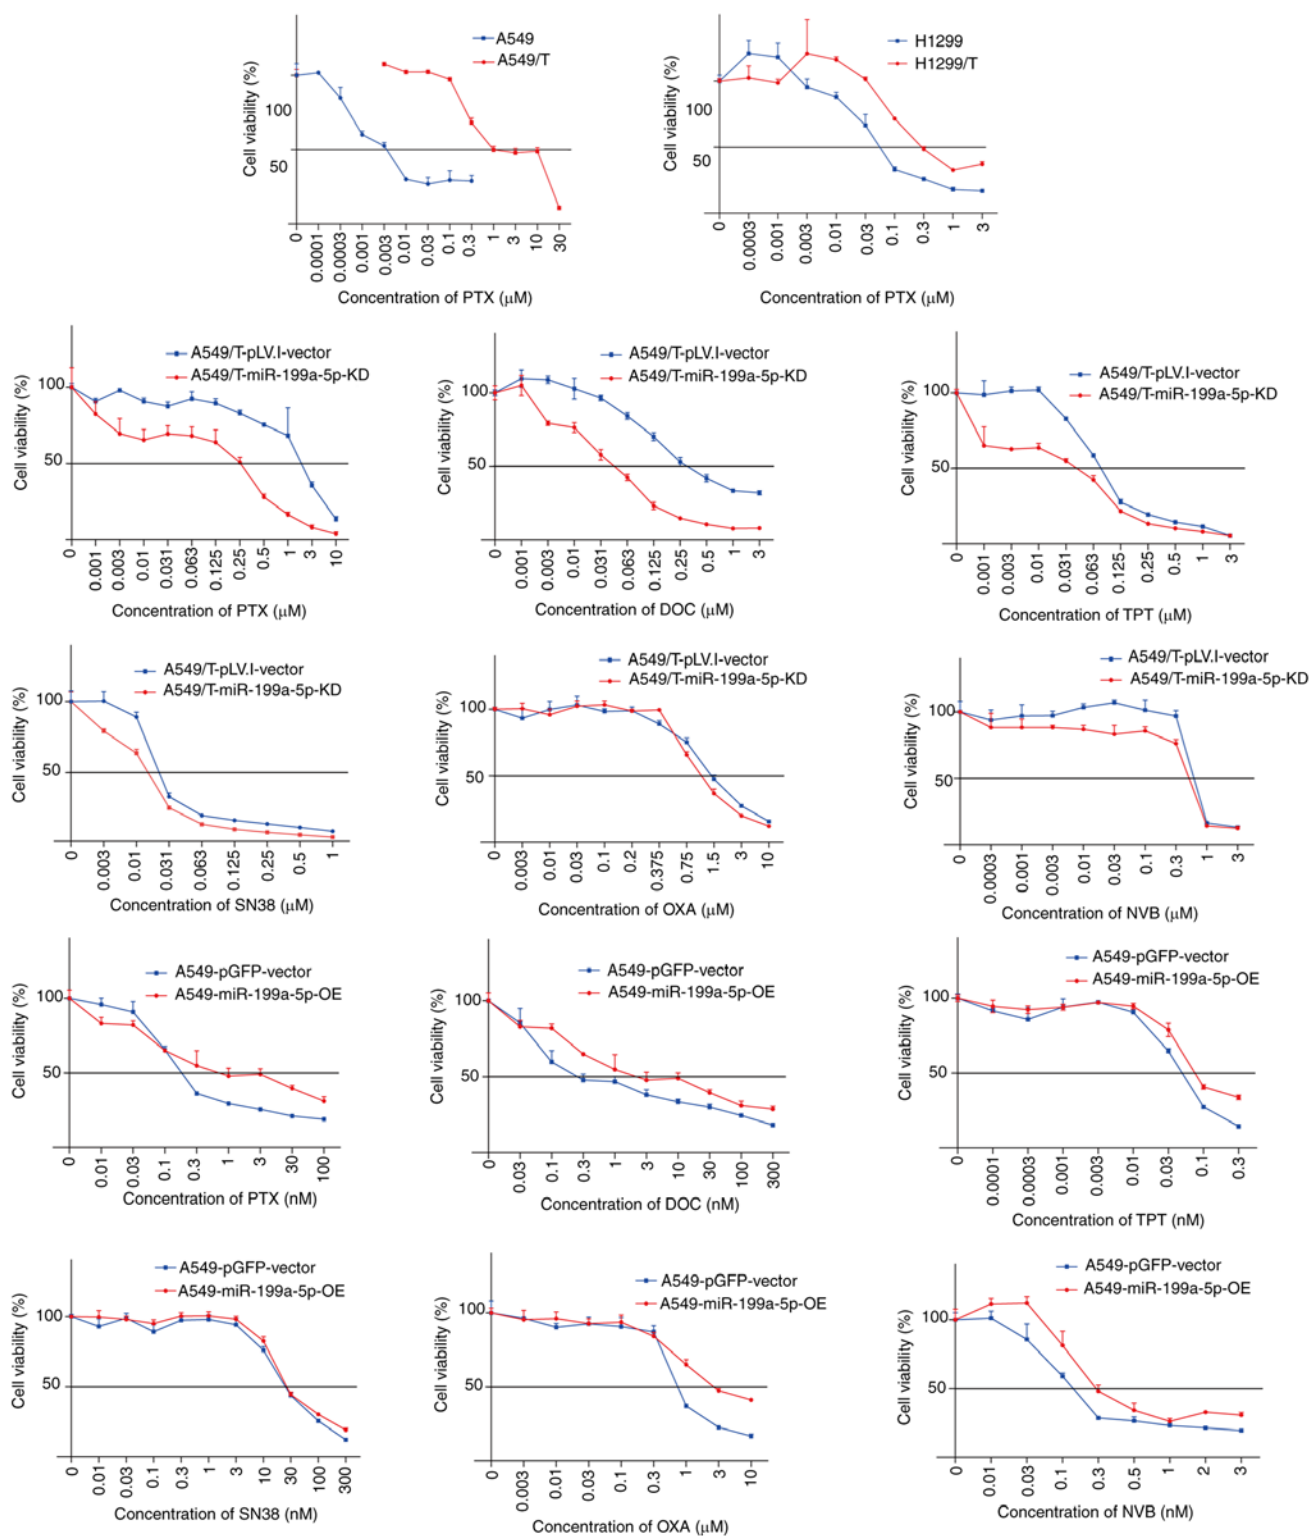

Table SI. Sequences used for quantitative PCR.

| Target          | Sequences (5'→3')                                          |
|-----------------|------------------------------------------------------------|
| U6              | F: AGAGAAGATTAGCATGGCCCCTG<br>R: AGTGCAGGGTCCGAGGTATT      |
| hsa-miR-199a-5p | F: CGCGCCCAGTGTTTCAGACTAC<br>R: AGTGCAGGGTCCGAGGTATT       |
| $\beta$ -actin  | F: CTACCTCATGAAGATCCTGACC<br>R: CACAGCTTCTCTTTGATGTCAC     |
| p62/SQSTM1      | F: TGATTGAGTCCCTCTCCCAGATGC<br>R: CCGCTCCGATGTCATAGTTCTTGG |
| ATG5            | F: GATGGGATTGCAAAATGACAGA<br>R: GAAAGGTCTTTCAGTCGTTGTC     |
| ATG7            | F: TGTATAACACCAACACACTCGA<br>R: GGCAGGATAGCAAAACCAATAG     |

miR, microRNA; SQSTM1, Sequestosome-1; ATG, autophagy-related.
